## REFERENCES

1. Segredo V, Matthey MA, Sharma ML, Gruenke LD, Caldwell JE, Miller RD: Prolonged neuromuscular blockade after long-term

administration of vecuronium in two critically ill patients. *ANESTHESIOLOGY* 72:566-570, 1990  
2. Aminoff MJ: *Electrodiagnosis in Clinical Neurology*, New York, Churchill Livingstone, 1986, pp 231-332

(Accepted for publication May 21, 1990.)

Anesthesiology  
73:366, 1990

## Safety of Transesophageal Echocardiography Is Still Unclear

*To the Editor:*—Recently Urbanowicz *et al.*<sup>1</sup> described the potential for esophageal damage with transesophageal echocardiography (TEE). We have two questions and related comments that pertain to this study: 1) Does esophageal surface pressure (ESP) as measured by the modified probe accurately reflect the pressure produced by contact between a conventional TEE probe and the esophagus? 2) What is the clinical significance of ESP? Urbanowicz *et al.* studied six patients and three dogs with a modified TEE probe designed to measure ESP generated by probe flexion. The transducer tip of the modified probe was fitted with a water-filled Silastic balloon connected to an external pressure monitor. The balloon tip disperses the force generated by probe flexion onto a larger surface area of the esophagus with a resultant decrease in esophageal surface pressure. Therefore, this study may significantly underestimate the force generated by a conventional TEE probe, and hence may underestimate risk of esophageal injury.

Urbanowicz *et al.* attempted to simulate the worst clinical scenario with continuous probe flexion and could not demonstrate esophageal injury, either histologically (animals) or symptomatically (humans). None of the animals sustained "abnormally" high ESP, but one of the patients did, despite no history of preexisting esophageal disease. It would be informative to know if the investigators noticed any resistance to probe flexion in this patient.

The clinical significance of ESP is appreciated by gastroenterologists who use esophageal tamponade and dilatation. To minimize injury during esophageal tamponade, inflation pressures are limited to 35-45 mmHg.<sup>2,3</sup> Perhaps an animal model can be developed to establish a relationship between elevated ESP during TEE and esophageal injury. If elevated surface pressure was associated with esophageal injury, then this measurement may have significant clinical implications in patients undergoing TEE.

Ultrasound transducers not only produce pressure at the site of contact but also generate heat and place the patient at risk for thermal injury. The water-filled balloon on the modified probe used in this study may function as an insulator and protect the esophageal mucosa from injury. If maximum power output was maintained for up to 8 h in the animal studied with the conventional TEE probe (*i.e.*, without a balloon), it is of interest that no evidence of thermal injury was detected on histologic examination of the esophageal mucosa. Most TEE instruments designed for intraoperative use have a thermocouple to monitor transducer tip temperature and possess an automatic shut-down mechanism if a preset threshold (42° C) is reached. Thermal monitoring is clinically relevant only when the instrument is used for

extended periods or when adjacent structures are deliberately cooled (*e.g.*, posterior left ventricle with cold cardioplegia).

Urbanowicz *et al.* should be applauded in addressing this issue. Their study confirms previous animal studies that reported no evidence of esophageal injury after TEE.<sup>4</sup> Although continuous compression of tissue blood supply may result in ischemia and necrosis, the consequences of a routine TEE evaluation with intermittent compression are poorly understood and are unlikely to be associated with significant injury. However, we believe that the approach used in this study significantly underestimates the force that is transmitted onto the esophageal wall by a conventional TEE probe.

JOSEPH S. SAVINO, M.D.  
Assistant Professor

STUART WEISS, M.D., Ph.D.  
Cardiothoracic Anesthesia Fellow

Department of Anesthesia  
University of Pennsylvania  
3400 Spruce Street  
Philadelphia, Pennsylvania 19104-4283

## REFERENCES

1. Urbanowicz J, Kernoff RS, Oppenheim G, Parnagian E, Billingham ME, Popp RL: Transesophageal echocardiography and its potential for esophageal damage. *ANESTHESIOLOGY* 72:40-43, 1990
2. Gossat D, Bolin TD: An unusual complication of balloon tamponade in the treatment of esophageal varices: A case report and brief review of the literature. *Am J Gastroenterol* 80:600-601, 1985
3. Nickell MD, Schwitzer GA, Gremillion DE: Overdistension of the gastric balloon: Complication with the Sengstaken-Blakemore tube. *JAMA* 240:1172-1173, 1978
4. O'Shea JP, D'Ambra MN, Magro C, Guerrero JL, Marshall JE, Vlahakes CJ, Jacobs M, Levine RA: Transesophageal echocardiography: Is it safe to the esophagus? An *in vivo* study (abstract). *Circulation(suppl)* 78:1756, 1988

(Accepted for publication May 22, 1990.)

Anesthesiology  
73:366-367, 1990

*In Reply:*—We believe that the pressure transducer accurately records the contact pressure between the esophagus and the ultrasonic probe, since the esophagus is sufficiently malleable that the whole face of the

ultrasonic probe stays in contact with the esophagus both in animals and in humans during these experiments. This pressure transducer accurately records pressure when as little as 25% of its surface is in
